# Supplementary material
Source: PubMed Central journal article supplement (PMC3446847)
Supplement: NIHMS404616-supplement-supplemental-data.pdf [file NIHMS404616-supplement-supplemental-data.pdf]

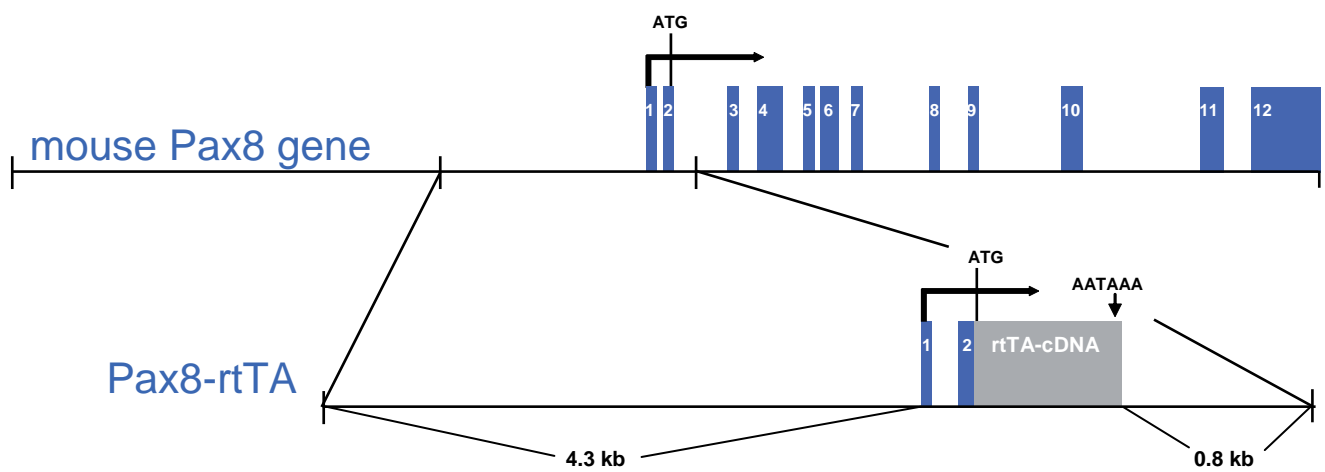

### Supplementary Figure 1. Generation of the Pax8-rtTA transgenic line.

The exon-intron structure of the mouse Pax8 locus is shown above. Exons are indicated as numbered boxes. The recombinant rtTA-cDNA containing a consensus Kozak translational initiation site and a polyadenylation signal (AATAAA) was used to replace the endogenous Pax8 start codon (ATG) located within exon 2. The final Pax8-rtTA construct (shown below) contains 4.3 kb of upstream regulatory sequence, complete exon 1 and intron 1, part of exon 2 and 0.8 kb of intron 2 of the murine Pax8 gene.



Supporting Online Material for

**An Efficient and Versatile System for Acute and Chronic Modulation of Renal Tubular  
Function in Transgenic Mice**

Milena Traykova-Brauch, Kai Schöning, Oliver Greiner, Tewfik Miloud, Anna Jauch, Manja Neumann, Dean W Felsher, Adam B Glick, David J Kwiatkowski, Hermann Bujard, Jürgen Horst, Magnus von Knebel Doeberitz, Felix K Niggli, Wilhelm Kriz, Hermann-Josef Gröne, Robert Koesters\*

\* To whom Correspondence should be addressed.

email: r.koesters@dkfz.de
